# Supplementary material
Source: publisher figshare collection journal article supplement (https://tandf.figshare.com/ndownloader/files/13355384)
Supplement: Supplementary file 1 [file 13355384]

Appendix A

**Table 1**. *Example material.*

|  |  | **Polarity** |  | **Sentence** |  | **Truth Value** |
| --- | --- | --- | --- | --- | --- | --- |
| **Correct** |  | Affirmative |  | *Blood is indeed red.*  *Nuns are obviously female.*  *Ants are clearly hardworking.* |  | True |
|  | Negated |  | *Blood is not red.*  *Nuns are not female.*  *Ants are not hardworking.* |  | False |
| **World-Knowledge** |  | Affirmative |  | *Swans are indeed red.*  *Cardinals are obviously female.*  *Pandas are clearly hardworking.* |  | False |
|  | Negated |  | *Swans are not red.*  *Cardinals are not female.*  *Pandas are not hardworking.* |  | True |
| **Semantic** |  | Affirmative |  | *Decimeters are indeed red.*  *Chairs are obviously female.*  *Slogans are clearly hardworking.* |  | Nonsensical/  Falsea |
|  | Negated |  | *Decimeters are not red.*  *Chairs are not female.*  *Slogans are not hardworking.* |  | Nonsensical/  Truea |

Note. a In principle, it is unclear whether semantically violated sentences can receive a truth value.
